# Supplementary material
Source: MDPI journal article supplement (https://www.mdpi.com/2073-4441/13/21/3100)
Supplement: s1 [file s1]

# Supplementary Material

## Optimizing ADM1 calibration and input characterization for effective co-digestion modelling

Arianna Catenacci<sup>1\*</sup>, Matteo Grana<sup>1</sup>, Francesca Malpei<sup>1</sup>, Elena Ficara<sup>1</sup>

<sup>1</sup> Politecnico di Milano, *Dipartimento di Ingegneria Civile e Ambientale, Piazza Leonardo da Vinci 32, 20133 Milano, Italy;*

\* Correspondence: arianna.catenacci@polimi.it; Tel.: 02.2399 6241

**Table S1.** Kinetic parameters estimated at each iterative step of the calibration process.

| Parameter    | Unit                               | Initial | 1 <sup>st</sup> | 2 <sup>nd</sup> | 3 <sup>rd</sup> | 4 <sup>th</sup> | 5 <sup>th</sup> | 6 <sup>th</sup> |
|--------------|------------------------------------|---------|-----------------|-----------------|-----------------|-----------------|-----------------|-----------------|
| $k_{dis}$    | d <sup>-1</sup>                    | 0.4     | 1.2             | 2               | 1.5             | 1.5             | 1.5             | 1.5             |
| $k_{hyd,ch}$ | d <sup>-1</sup>                    | 0.25    | 0.75            | 0.75            | 0.3             | 0.3             | 0.3             | 0.3             |
| $k_{hyd,pr}$ | d <sup>-1</sup>                    | 0.2     | 0.6             | 0.6             | 0.2             | 0.2             | 0.2             | 0.5             |
| $k_{hyd,li}$ | d <sup>-1</sup>                    | 0.1     | 0.3             | 0.8             | 0.45            | 0.5             | 0.5             | 0.5             |
| $k_{m,su}$   | d <sup>-1</sup>                    | 30      | 30              | 38              | 38              | 8               | 8               | 8               |
| $k_{m,aa}$   | d <sup>-1</sup>                    | 50      | 50              | 8               | 8               | 8               | 8               | 8               |
| $k_{m,ac}$   | d <sup>-1</sup>                    | 8       | 8               | 6               | 6               | 8               | 8               | 8               |
| $K_{S,su}$   | kg <sub>COD</sub> ·m <sup>-3</sup> | 0.5     | 0.5             | 0.4             | 0.3             | 0.3             | 0.3             | 0.3             |
| $K_{S,aa}$   | kg <sub>COD</sub> ·m <sup>-3</sup> | 0.3     | 0.3             | 0.2             | 0.2             | 0.2             | 0.2             | 0.2             |
| $K_{S,ac}$   | kg <sub>COD</sub> ·m <sup>-3</sup> | 0.15    | 0.15            | 0.3             | 0.01            | 0.01            | 0.01            | 0.01            |
| $K_{S,pro}$  | kg <sub>COD</sub> ·m <sup>-3</sup> | 0.3     | 0.3             | 0.3             | 0.3             | 0.3             | 0.2             | 0.2             |

**Table S2.** Model performance criteria (TIC and MARE) evaluated at varying of the iterative step for selected batch activity tests and BMP tests.

| Testing substrate<br>(Phase - Date) | Model fitting<br>criteria | 1 <sup>st</sup> Iteration | 5 <sup>th</sup> Iteration | 6 <sup>th</sup> Iteration |
|-------------------------------------|---------------------------|---------------------------|---------------------------|---------------------------|
| Acetate                             | TIC                       | 0.157                     | 0.102                     | 0.102                     |
| (Phase I - 26.11.2020)              | MARE                      | 0.080                     | 0.056                     | 0.056                     |
| Glucose                             | TIC                       | 0.093                     | 0.038                     | 0.038                     |
| (Phase I - 19.11.2020)              | MARE                      | 0.060                     | 0.023                     | 0.023                     |
| BSA                                 | TIC                       | 0.194                     | 0.075                     | 0.075                     |
| (Phase I - 26.11.2020)              | MARE                      | 0.185                     | 0.058                     | 0.058                     |
| BMP – Sludge                        | TIC                       | 0.042                     | 0.015                     | 0.032                     |
| (Phase I - 19.11.2020)              | MARE                      | 0.039                     | 0.016                     | 0.031                     |
| BMP – Sludge                        | TIC                       | 0.104                     | 0.055                     | 0.094                     |
| (Phase II - 25.02.2021)             | MARE                      | 0.131                     | 0.080                     | 0.126                     |
| BMP – Yogurt                        | TIC                       | 0.028                     | 0.060                     | 0.034                     |
| (Phase I - 30.12.2020)              | MARE                      | 0.020                     | 0.040                     | 0.025                     |
| BMP – Yogurt                        | TIC                       | 0.038                     | 0.049                     | 0.038                     |
| (Phase II - 25.02.2021)             | MARE                      | 0.026                     | 0.036                     | 0.026                     |
| BMP – Co-digestion                  | TIC                       | 0.013                     | 0.047                     | 0.009                     |
| (Phase I - 30.12.2020)              | MARE                      | 0.012                     | 0.037                     | 0.009                     |
| BMP – Co-digestion                  | TIC                       | 0.014                     | 0.053                     | 0.011                     |
| (Phase II - 25.02.2020)             | MARE                      | 0.011                     | 0.038                     | 0.011                     |

**Table S3.** Model performance criteria (TIC and MARE) evaluated at the varying of the iterative step for the seven output variables monitored during the operation of the pilot plant. A distinction is made between the mono-digestion period (Phase I and Phase III) the co-digestion period (Phase II).

| Fitting parameter            | Pilot plant operation mode | 1 <sup>st</sup> iteration |       | 5 <sup>th</sup> iteration |       | 6 <sup>th</sup> iteration |       | Tentative iteration |       |
|------------------------------|----------------------------|---------------------------|-------|---------------------------|-------|---------------------------|-------|---------------------|-------|
|                              |                            | MARE                      | TIC   | MARE                      | TIC   | MARE                      | TIC   | MARE                | TIC   |
| Q <sub>CH4</sub>             | Total                      | 0.162                     | 0.070 | 0.274                     | 0.112 | 0.274                     | 0.112 | 0.274               | 0.112 |
| Alkalinity                   | Total                      | 0.100                     | 0.066 | 0.151                     | 0.107 | 0.139                     | 0.095 | 0.089               | 0.054 |
|                              | Mono-digestion             | 0.080                     | 0.049 | 0.110                     | 0.075 | 0.110                     | 0.075 | 0.099               | 0.064 |
|                              | Co-digestion               | 0.145                     | 0.088 | 0.243                     | 0.147 | 0.203                     | 0.122 | 0.065               | 0.035 |
| TVFA                         | Total                      | 2.002                     | 0.475 | 0.443                     | 0.194 | 0.472                     | 0.199 | 0.507               | 0.207 |
|                              | Mono-digestion             | 1.342                     | 0.446 | 0.188                     | 0.162 | 0.191                     | 0.162 | 0.190               | 0.162 |
|                              | Co-digestion               | 3.542                     | 0.632 | 1.038                     | 0.338 | 1.127                     | 0.356 | 1.246               | 0.379 |
| pH                           | Total                      | 0.018                     | 0.011 | 0.023                     | 0.014 | 0.022                     | 0.013 | 0.017               | 0.011 |
|                              | Mono-digestion             | 0.019                     | 0.011 | 0.024                     | 0.014 | 0.024                     | 0.013 | 0.019               | 0.011 |
|                              | Co-digestion               | 0.015                     | 0.012 | 0.021                     | 0.014 | 0.018                     | 0.013 | 0.011               | 0.009 |
| NH <sub>4</sub> <sup>+</sup> | Total                      | 0.150                     | 0.080 | 0.118                     | 0.070 | 0.099                     | 0.055 | 0.099               | 0.055 |
|                              | Mono-digestion             | 0.198                     | 0.103 | 0.107                     | 0.060 | 0.107                     | 0.059 | 0.107               | 0.059 |
|                              | Co-digestion               | 0.043                     | 0.026 | 0.143                     | 0.083 | 0.082                     | 0.050 | 0.082               | 0.050 |
| VS                           | Total                      | 0.339                     | 0.220 | 0.233                     | 0.151 | 0.238                     | 0.156 | 0.238               | 0.156 |
|                              | Mono-digestion             | 0.353                     | 0.230 | 0.255                     | 0.167 | 0.256                     | 0.167 | 0.256               | 0.167 |
|                              | Co-digestion               | 0.307                     | 0.196 | 0.181                     | 0.111 | 0.196                     | 0.127 | 0.196               | 0.127 |
| COD                          | Total                      | 0.198                     | 0.097 | 0.147                     | 0.067 | 0.156                     | 0.070 | 0.156               | 0.070 |
|                              | Mono-digestion             | 0.213                     | 0.099 | 0.200                     | 0.084 | 0.200                     | 0.084 | 0.200               | 0.084 |
|                              | Co-digestion               | 0.169                     | 0.095 | 0.041                     | 0.024 | 0.069                     | 0.041 | 0.069               | 0.041 |
